# Supplementary material for: Genomic insights from whole genome sequencing of four clonal outbreak Campylobacter jejuni assessed within the global C. jejuni population
Source: PubMed Central journal article supplement (PMC5135748; doi:10.1186/s12864-016-3340-8), 2016-12-03
Supplement: 12864_2016_3340_MOESM1_ESM.pdf [file 12864_2016_3340_MOESM1_ESM.pdf]

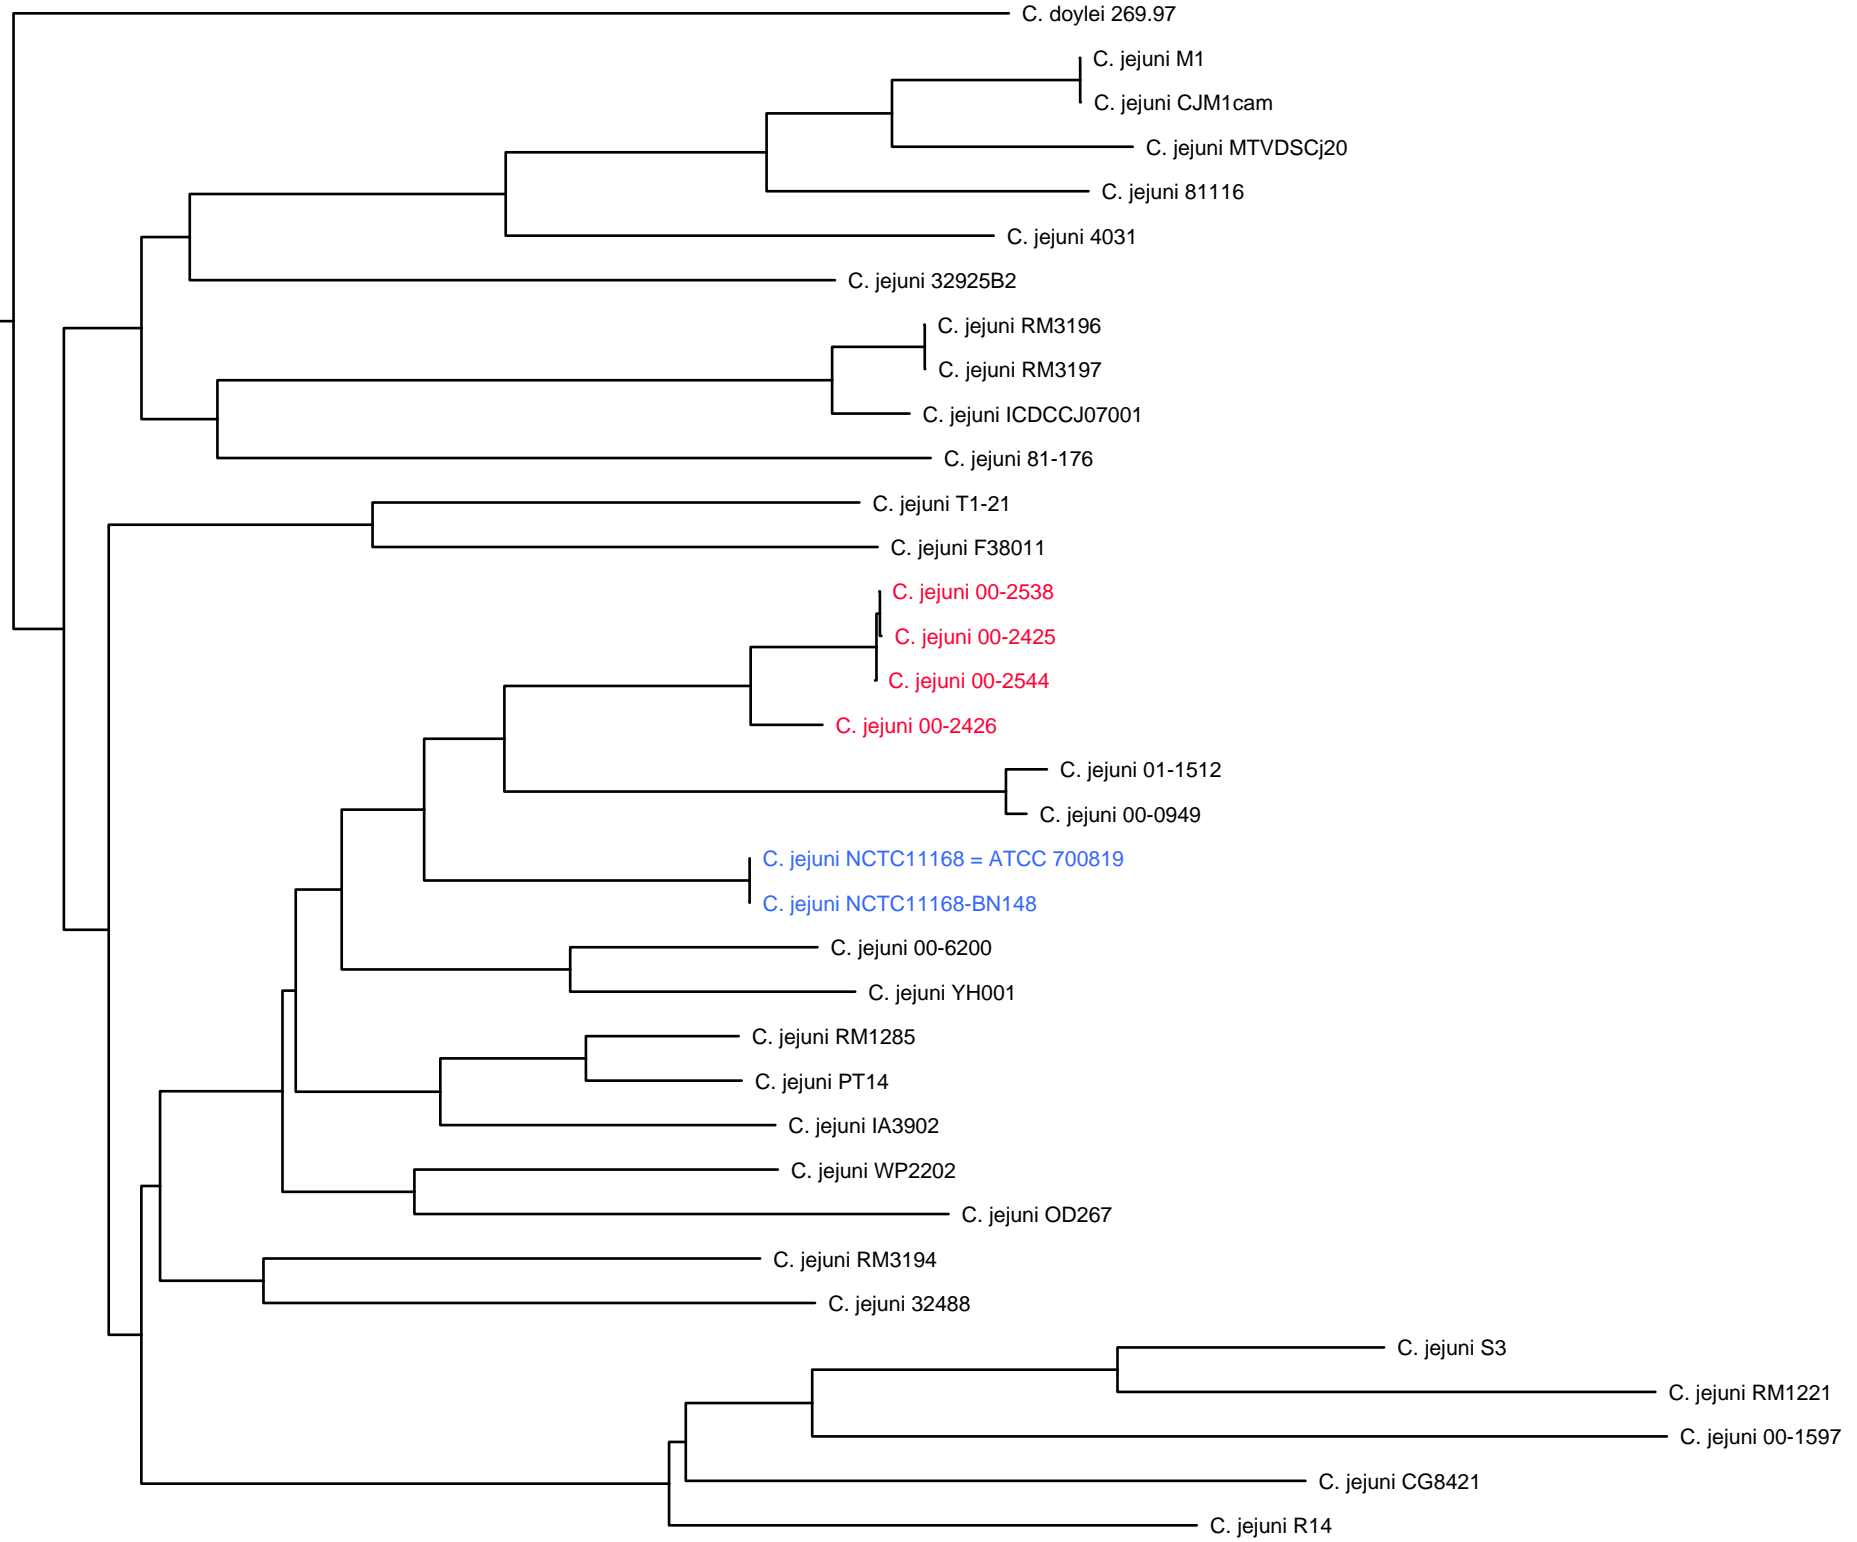

0.01
