# Supplementary material for: Genomic insights from whole genome sequencing of four clonal outbreak Campylobacter jejuni assessed within the global C. jejuni population
Source: PubMed Central journal article supplement (PMC5135748; doi:10.1186/s12864-016-3340-8), 2016-12-03
Supplement: 12864_2016_3340_MOESM4_ESM.pdf [file 12864_2016_3340_MOESM4_ESM.pdf]

**NCTC11168**

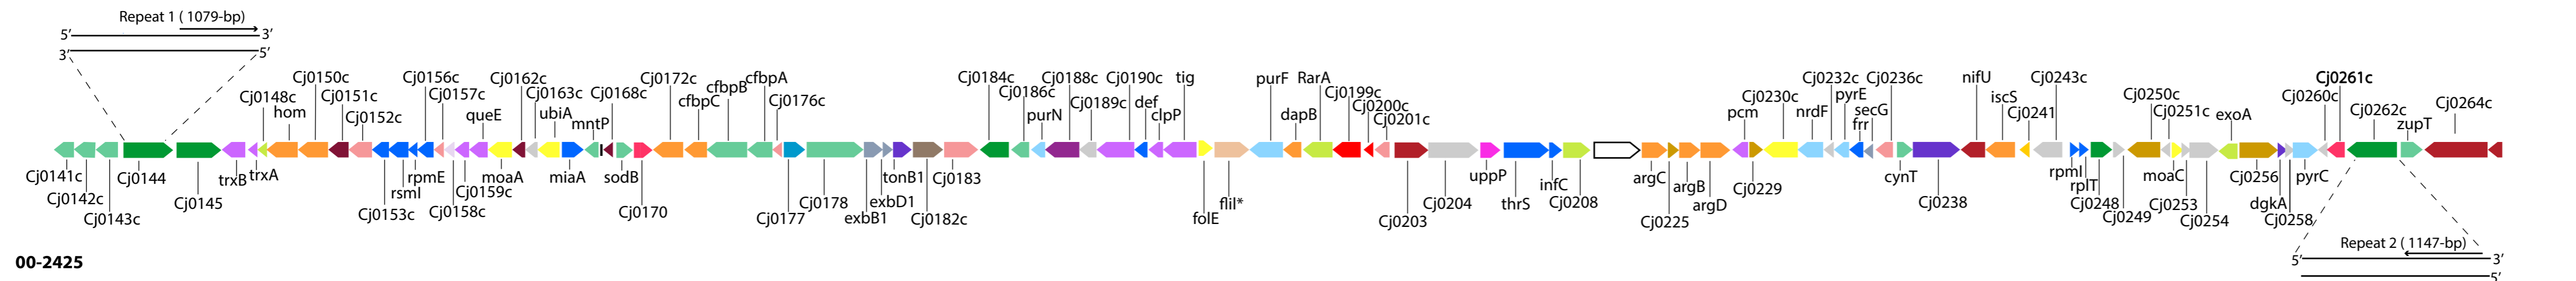

**00-2425**

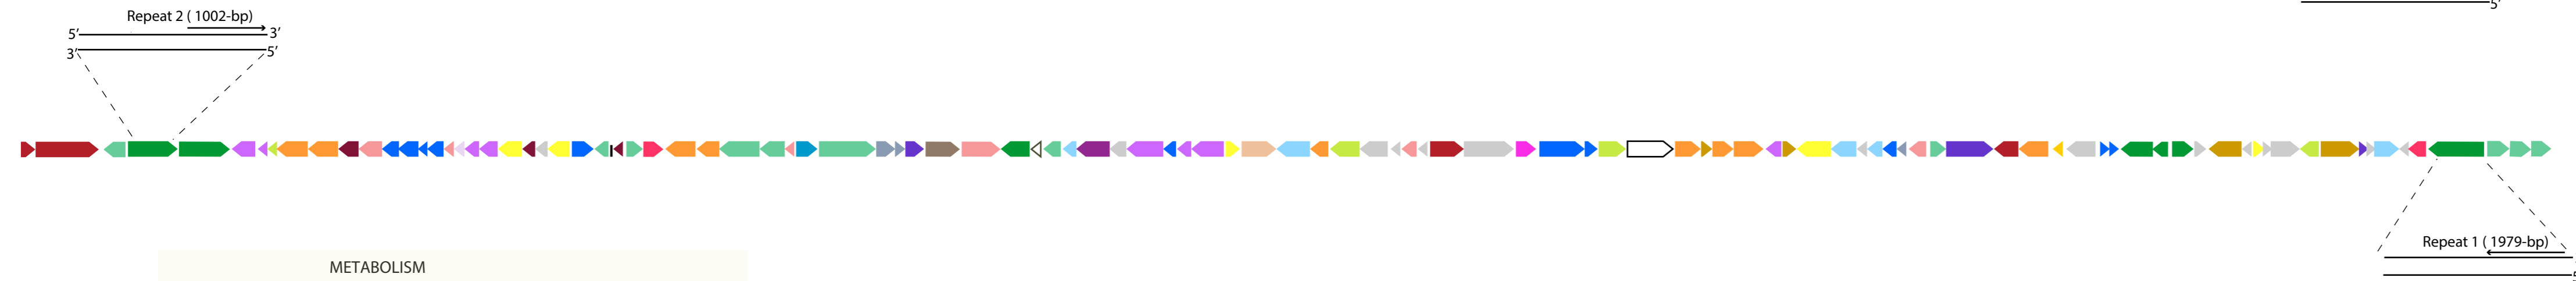

**METABOLISM**

- (C) energy production and conversion
- (E) Amino acid transport and metabolism
- (F) nucleotide transport and metabolism
- (G) carbohydrate transport and metabolism
- (H) coenzyme transport and metabolism
- (I) lipid transport and metabolism
- (P) inorganic ion transport and metabolism
- (Q) secondary metabolites biosynthesis, transport and catabolism

**CELLULAR PROCESSES & SIGNALLING**

- (M) cell wall envelope, membrane biogenesis
- (N) cell motility
- (O) post-translational modification, protein turnover and chaperones
- (T) Signal transduction mechanisms
- (U) intracellular trafficking, secretion and vesicular transport
- (V) defense mechanisms

**INFORMATION STORAGE & PROCESSING**

- (J) translation, ribosomal structure and biogenesis
- (L) replication, recombination and repair

**POORLY CHARACTERIZED**

- (R) general function protein
- (S) function unknown, hypothetical proteins

**OTHER-NOT COG GROUPS**

- periplasmic protein
- membrane and integral proteins
- lipoprotein
- Iron transport protein
